# Supplementary material for: Effects of External Radiation Exposure on Perinatal Outcomes in Pregnant Women After the Fukushima Daiichi Nuclear Power Plant Accident: the Fukushima Health Management Survey
Source: PubMed Central journal article supplement (PMC9703922; doi:10.2188/jea.je20210252), 2022-12-05
Supplement: je-32-S104-s001.pdf [file je-32-S104-s001.pdf]

**eTable 1.** Association between obstetric outcomes and external radiation dose in Group B

|                                 | Ref.        | Congenital abnormality |                   |            |      |                   |             | Low birth weight |                   |            |      |                   |             |
|---------------------------------|-------------|------------------------|-------------------|------------|------|-------------------|-------------|------------------|-------------------|------------|------|-------------------|-------------|
|                                 |             | OR                     | Crude<br>(95% CI) | <i>P</i> * | OR   | Crude<br>(95% CI) | <i>P</i> ** | OR               | Crude<br>(95% CI) | <i>P</i> * | OR   | Crude<br>(95% CI) | <i>P</i> ** |
| External radiation dose         |             |                        |                   |            |      |                   |             |                  |                   |            |      |                   |             |
| 1 to <2 mSv                     | <1          | 1.01                   | (0.80–1.28)       | 0.934      | 1.02 | (0.80–1.29)       | 0.887       | 0.98             | (0.86–1.12)       | 0.764      | 0.99 | (0.86–1.13)       | 0.856       |
| ≥2 mSv                          | <1          | 1.00                   | (0.51–1.97)       | 0.998      | 1.02 | (0.52–2.02)       | 0.945       | 0.82             | (0.54–1.23)       | 0.332      | 0.82 | (0.53–1.25)       | 0.347       |
| Maternal age                    | 1SD         | 1.11                   | (0.99–1.24)       | 0.082      |      |                   |             | 1.04             | (0.97–1.11)       | 0.259      |      |                   |             |
| Child's sex                     | Female      | 1.29                   | (1.03–1.62)       | 0.026      | 1.29 | (1.03–1.62)       | 0.027       | 0.69             | (0.61–0.79)       | <0.001     | 0.68 | (0.60–0.78)       | <0.001      |
| Days of from<br>3.11.2011       | 1SD         | 0.99                   | (0.89–1.11)       | 0.892      |      |                   |             | 0.98             | (0.92–1.05)       | 0.586      |      |                   |             |
| Gestational days<br>at delivery | 1SD         | 0.79                   | (0.73–0.85)       | <0.001     |      |                   |             | 0.25             | (0.23–0.27)       | <0.001     |      |                   |             |
| Primiparous, %                  | Multiparous | 1.11                   | (0.88–1.39)       | 0.388      |      |                   |             | 1.23             | (1.08–1.40)       | 0.002      | 1.17 | (1.03–1.34)       | 0.018       |
| LBW                             | ≥2,500 g    | 2.43                   | (1.82–3.24)       | <0.001     |      |                   |             | –                | –                 |            |      |                   |             |
| SGA                             | ≥–10%       | 2.47                   | (1.74–3.50)       | <0.001     |      |                   |             | 23.22            | (19.94–27.05)     | <0.001     |      |                   |             |
| Preterm birth                   | ≥37 weeks   | 2.72                   | (1.92–3.84)       | <0.001     |      |                   |             | 25.39            | (21.12–30.52)     | <0.001     |      |                   |             |
| Placenta previa                 | No          | 1.82                   | (0.85–3.91)       | 0.127      |      |                   |             | 2.75             | (1.85–4.10)       | <0.001     | 2.46 | (1.62–3.72)       | <0.001      |
| Infertility<br>treatment        | No          | 1.39                   | (0.96–2.01)       | 0.079      |      |                   |             | 1.35             | (1.08–1.67)       | 0.008      | 1.19 | (0.94–1.49)       | 0.143       |



|                                     |    |      |             |        |      |             |        |      |             |        |      |             |        |
|-------------------------------------|----|------|-------------|--------|------|-------------|--------|------|-------------|--------|------|-------------|--------|
| Placenta previa                     | No | 0.75 | (0.40–1.44) | 0.389  |      |             |        | 6.38 | (4.36–9.35) | <0.001 | 5.74 | (3.87–8.53) | <0.001 |
| Infertility treatment               | No | 1.14 | (0.90–1.44) | 0.281  |      |             |        | 1.37 | (1.03–1.81) | 0.030  | 1.09 | (0.81–1.47) | 0.563  |
| Hypertensive disorders of pregnancy | No | 3.06 | (2.39–3.92) | <0.001 | 3.15 | (2.46–4.04) | <0.001 | 5.78 | (4.47–7.47) | <0.001 | 5.52 | (4.25–7.18) | <0.001 |
| Mental disorders before birth       | No | 1.22 | (0.90–1.67) | 0.207  |      |             |        | 1.52 | (1.05–2.20) | 0.026  | 1.45 | (0.99–2.11) | 0.057  |
| Evacuation area                     | No | 0.93 | (0.75–1.14) | 0.470  |      |             |        | 1.04 | (0.80–1.36) | 0.748  |      |             |        |

CI, confidence interval; LBW, low birth weight; OR, odds ratio; SGA, small for gestational age.

\* Univariate logistic regression analysis by forced entry method.

\*\* Factors significant in univariate analysis were entered into multivariate analysis using binominal logistic regression.
